# Supplementary material for: Specific Expression of Antimicrobial Peptides from the Black Soldier Fly in the Midgut of Silkworms (Bombyx mori) Regulates Silkworm Immunity
Source: MDPI journal article supplement (doi:10.3390/insects14050443), 2023-05-08
Supplement: s1 [file s1]

**Table S1** Primers used in this study.

| Name             | Primer sequence                              | purpose                                                                                                                |
|------------------|----------------------------------------------|------------------------------------------------------------------------------------------------------------------------|
| HiOGS01149-F     | <u>CGGGATCC</u> ATGGATTACAAGGATGACGACGATAAG  | Gene clone                                                                                                             |
|                  | AGTTATAAGCTCTTAGCAC                          |                                                                                                                        |
| HiOGS01149-R     | <u>ATAAGAATGCGGCCG</u> CTTATCCACCTCCAAAGTTGG |                                                                                                                        |
| HiOGS03714-F     | <u>CGGGATCC</u> ATGGATTACAAGGATGACGACGATAAG  |                                                                                                                        |
|                  | AGCCAATTGGGAGACCTAG                          | The relative mRNA levels of <i>HiOGS03714</i> and <i>HiOGS01149</i> were investigated by qPCR                          |
| HiOGS03714-R     | <u>ATAAGAATGCGGCCG</u> CTATTTTTTCATCTTCTCAAG |                                                                                                                        |
|                  | GAACTCC                                      |                                                                                                                        |
| qHiOGS01149-F    | TTACCAAGAAGTGCTCCAAAG                        |                                                                                                                        |
| qHiOGS01149-R    | GTACACGACCATGAGAAGACG                        | Reference gene                                                                                                         |
| qHiOGS03714-F    | CGGTGGTGGCTCCATTCGT                          |                                                                                                                        |
| qHiOGS03714-R    | TTGCGGCCTCGTGTCTGC                           |                                                                                                                        |
| SW-F             | TTCGTAAGGCTCTTCTCGT                          |                                                                                                                        |
| SW-R             | CAAAGTTGATAGCAATTCCT                         | qPCR analysis of the expression of endogenous antimicrobial peptides and immune-related genes in transgenic silkworms. |
| qCecropin-F      | CTTCGTCCTCGCGTTGGT                           |                                                                                                                        |
| qCecropin-R      | AAGGATTTGCTTCCCTAT                           |                                                                                                                        |
| qGloverin-F      | GCACTTTGGGACAAAACGAT                         |                                                                                                                        |
| qGloverin-R      | TGGCTTGTGCATTCTTGTC                          | Validation of differentially expressed genes using qPCR                                                                |
| qImd-F           | CCGTATGCGAAAGGAA                             |                                                                                                                        |
| qImd-R           | TTGGAAGGTAGAGAGG                             |                                                                                                                        |
| qKWMTBOMO03767-F | GGATTCTTCTCGGGAGTATGGG                       |                                                                                                                        |
| qKWMTBOMO03767-R | AGCAGTGTGCAGCTGACAGGAC                       |                                                                                                                        |
| qKWMTBOMO08185-F | TTATTTTATGTTCGCTTGC                          |                                                                                                                        |
| qKWMTBOMO08185-R | CACATTGCGTTGTAGATTG                          |                                                                                                                        |
| qKWMTBOMO02953-F | GACGGCTGCCCTGCTTCCACATCA                     |                                                                                                                        |
| qKWMTBOMO02953-R | GCACACACGAACGCCACGCACAAA                     |                                                                                                                        |
| qKWMTBOMO03769-F | GCTGGATTATGATTATGGT                          |                                                                                                                        |
| qKWMTBOMO03769-R | GTACGGATTGTTTAGGGAC                          |                                                                                                                        |
| qKWMTBOMO02955-F | TATCGTAACATCACACATCACCTC                     |                                                                                                                        |
| qKWMTBOMO02955-R | ATATTGTACCAACGCACCAGACTC                     |                                                                                                                        |
| qKWMTBOMO01630-F | CGCCAACTCCACCTCCTACT                         |                                                                                                                        |
| qKWMTBOMO01630-R | CAATGCCATCACCATCACTG                         |                                                                                                                        |
| qKWMTBOMO05167-F | ACATCATACGAAGGCACCACAT                       |                                                                                                                        |
| qKWMTBOMO05167-R | CTGCTACTAAAGGACCACCCGA                       |                                                                                                                        |
| qKWMTBOMO04140-F | ATCTGCCTTTCGCGTACTTA                         |                                                                                                                        |
| qKWMTBOMO04140-R | TTGACACCGCTGTTCCCTTT                         |                                                                                                                        |
| qKWMTBOMO16427-F | TATTTCTTCGCCACGGTCC                          |                                                                                                                        |
| qKWMTBOMO16427-R | CCTCCCACTTGTTTATCCC                          |                                                                                                                        |
| qKWMTBOMO03380-F | AGCAGTTGATTGGAGAAGG                          |                                                                                                                        |
| qKWMTBOMO03380-R | ATGTTGCAGTGGAGTTGAG                          |                                                                                                                        |
| qKWMTBOMO16827-F | CCTGGAGGAAGAAGGCAAC                          |                                                                                                                        |
| qKWMTBOMO16827-R | CCAACCGCTTATTAAAGAT                          |                                                                                                                        |
| qKWMTBOMO10973-F | AGGGTTAGGTTTTTCTTTGT                         |                                                                                                                        |

---

qKWMTBOMO10973-R

---

AATCCTGCTTGGTAGGGTACT

Note: The underline of primer represents the restriction site BamHI and NotI. Bold represents the Flag protein tag sequences.
